# Supplementary material for: Differential gene expression orchestrated by transcription factors in osteoporosis: bioinformatics analysis of associated polymorphism elaborating functional relationships
Source: publisher site journal article supplement (doi:10.18632/aging.204136), 2022-06-21
Supplement: Supplementary file [file aging-v14i12-204136-supplementary-material-SD1.pdf]

SUPPLEMENTARY FIGURE

rs55785541

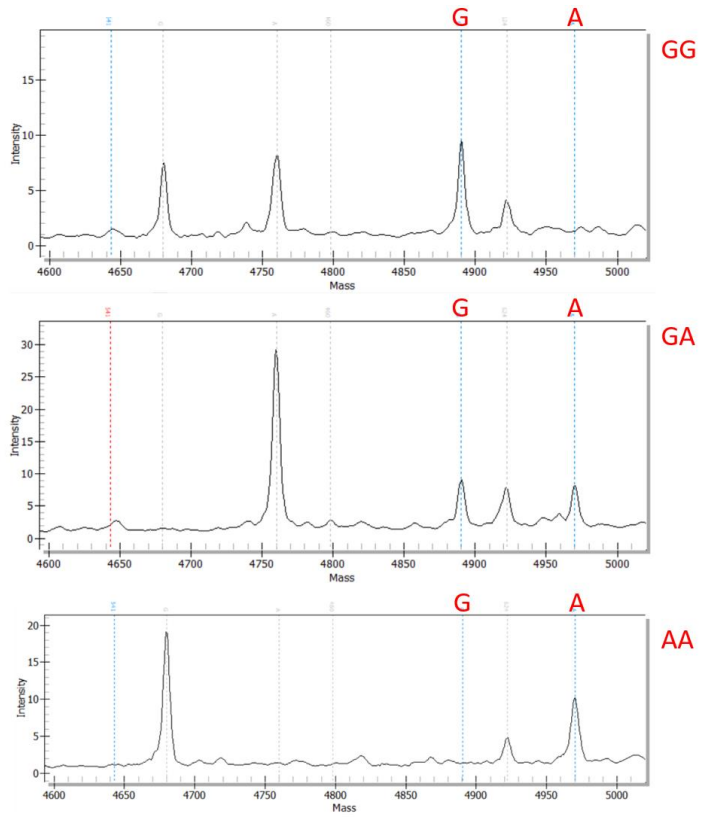

Supplementary Figure 1. Results of rs55785541 genotyping.
